# Supplementary material for: Effect of ion form of the ion-exchange resin on ε-poly-l-lysine purification from microbial fermentation broth
Source: Royal Society of Chemistry journal article supplement (doi:10.1039/c9ra00493a), 2019-01-01
Supplement: c9ra00493a1.pdf [file c9ra00493a1.pdf]

## Supporting information

### Effect of ion form of ion-exchange resin on $\epsilon$ -poly-L-lysine purification from microbial fermentation broth

Xusheng Chen\*, Qin Li, Honggang He, Jianhua Zhang, Zhonggui Mao

The Key Laboratory of Industrial Biotechnology, Ministry of Education, School of Biotechnology, Jiangnan University, Wuxi 214122, China

Fig. S1 Final pH of the sample solutions with different initial pH adsorbed by Amberlite IRC-50 resin with  $H^+$ ,  $Na^+$  and  $NH_4^+$  ion forms

Fig. S2 Sample photograph of each operation in the process of  $\epsilon$ -PL extraction.

Fig. S3 Positive-ion MALDI-TOF mass spectrum of extracted  $\epsilon$ -PL sample and commercial  $\epsilon$ -PL sample.

Table S1 Physical and chemical properties of resins

Table S2 Effect of NaOH concentration on  $\epsilon$ -PL desorption parameters on IRC-50 resin with  $Na^+$

Table S3 Effect of  $NH_3 \cdot H_2O$  concentration on  $\epsilon$ -PL desorption parameters on IRC-50 resin with  $NH_4^+$

Table S4 Effect of elution rate on the  $\epsilon$ -PL desorption parameters on IRC-50 resin with  $Na^+$

Table S5 Effect of elution rate on the  $\epsilon$ -PL desorption parameters on IRC-50 resin with  $NH_4^+$

Table S6 Dynamic adsorption and desorption parameters of  $\epsilon$ -PL on IRC-50 resin with  $H^+$ ,  $Na^+$  and  $NH_4^+$

Table S7 Physical and chemical parameters of the extracted and commercial  $\epsilon$ -PL hydrochloride samples

Table S8 The  $\epsilon$ -PL separation and purification parameters in ten times operation

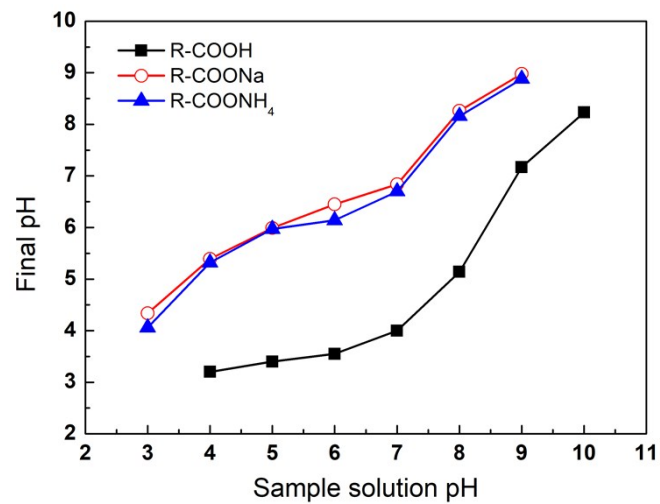

Fig. S1 Final pH of the sample solutions with different initial pH adsorbed by Amberlite IRC-50 resin with H<sup>+</sup>, Na<sup>+</sup> and NH<sub>4</sub><sup>+</sup> ion forms

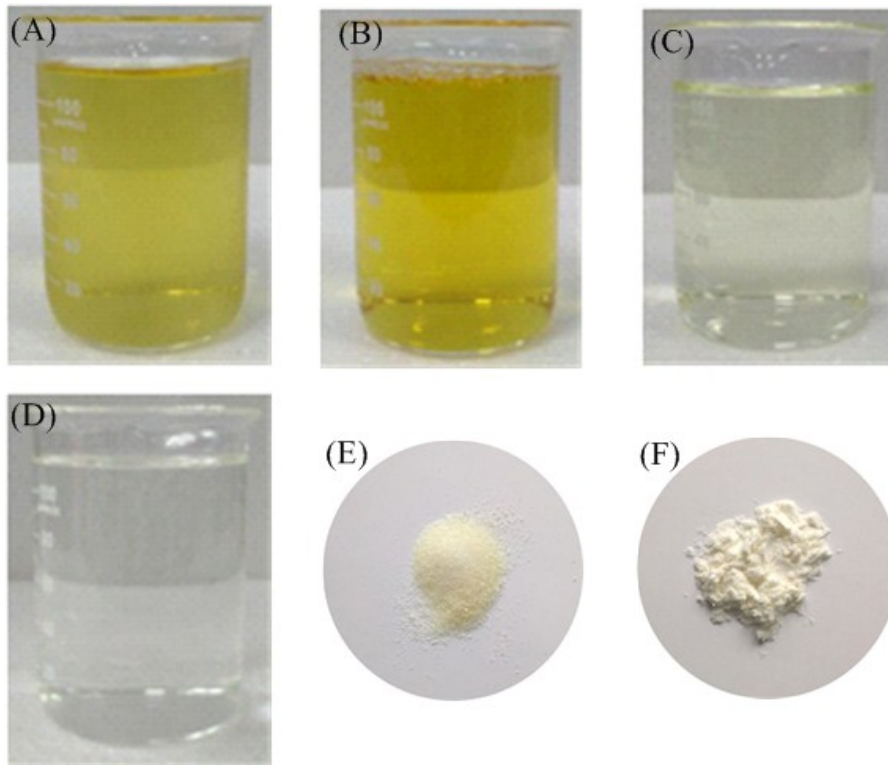

Fig. S2 Sample photograph of each operation in the process of  $\epsilon$ -PL extraction. (a) Supernatant of fermentation broth. (b) Elution of IRC-50 with  $\text{NH}_4^+$ . (c) Filtrate of decoloration by active carbon. (d) Retentate of 1.0 kDa ultrafiltration. (e) Extracted  $\epsilon$ -PL sample by vacuum drying. (f) Standard  $\epsilon$ -PL sample by spray drying.

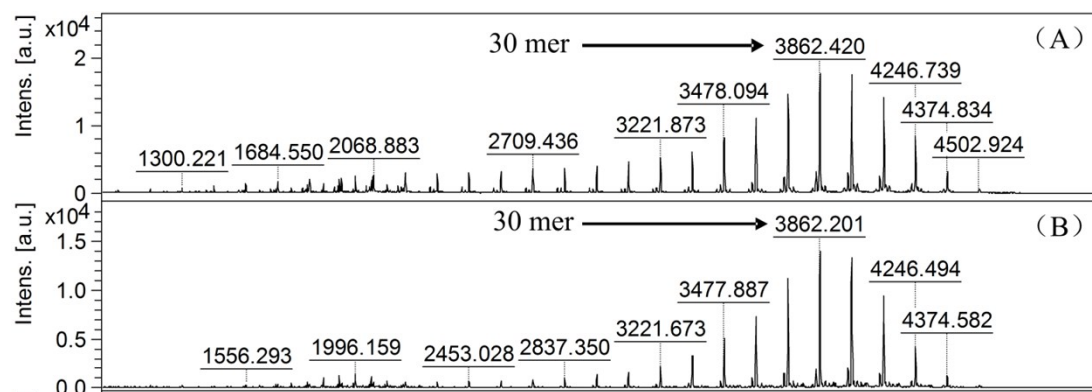

Fig. S3 Positive-ion MALDI-TOF mass spectrum of extracted  $\epsilon$ -PL sample (a) and commercial  $\epsilon$ -PL sample (b). The chain length could be calculated using the equation:  $(M_n - 19.02) / 128.17$ .

Table S1 Physical and chemical properties of resins

| Resin             | Matrix                     | Functional group   | Particle size (mm) | Total exchange capacity (mmol/g) | Moisture content (%) |
|-------------------|----------------------------|--------------------|--------------------|----------------------------------|----------------------|
| HD-8              | Styrene-divinylbenzene     | -SO <sub>3</sub> H | 0.3-1.2            | 4.0                              | 55-65                |
| HZD-3B            | Styrene-divinylbenzene     | -SO <sub>3</sub> H | 0.3-1.2            | 8.0                              | 52-65                |
| D113              | Acrylic-divinylbenzene     | -COOH              | 0.4-0.7            | 10.8                             | 45-52                |
| HZD-2             | Acrylic-divinylbenzene     | -COOH              | 0.3-1.2            | 9.5                              | 47-58                |
| DK110             | Acrylic-divinylbenzene     | -COOH              | 0.3-1.2            | 8.0                              | 52-65                |
| D115              | Acrylic-divinylbenzene     | -COOH              | 0.3-1.2            | 9.0                              | 45-55                |
| HD-2              | Acrylic-divinylbenzene     | -COOH              | 0.3-1.2            | 9.5                              | 65-75                |
| D152              | Acrylic-divinylbenzene     | -COOH              | 0.3-1.2            | 8.0                              | 50-65                |
| D155C             | Acrylic-divinylbenzene     | -COOH              | 0.3-1.2            | 7.5                              | 55-65                |
| D151              | Acrylic-divinylbenzene     | -COOH              | 0.3-1.2            | 9.5                              | 60-72                |
| Amberlite® IRC-50 | Methacrylic-divinylbenzene | -COOH              | 0.3-0.7            | 10.0                             | 43-53                |

Table S2 Effect of NaOH concentration on  $\epsilon$ -PL desorption parameters on IRC-50 resin with Na<sup>+</sup>

| NaOH concentration<br>(mol/L) | Elution time<br>(min) | Desorption ratio<br>(%) | NaOH amount<br>(mmol) |
|-------------------------------|-----------------------|-------------------------|-----------------------|
| 0.05                          | 480                   | 27.45                   | 25.2                  |
| 0.10                          | 480                   | 87.18                   | 50.4                  |
| 0.15                          | 422                   | 95.08                   | 63.3                  |
| 0.20                          | 342                   | 96.16                   | 71.8                  |
| 0.25                          | 300                   | 95.91                   | 73.2                  |
| 0.30                          | 275                   | 96.58                   | 85.8                  |

Table S3 Effect of  $\text{NH}_3 \cdot \text{H}_2\text{O}$  concentration on  $\epsilon$ -PL desorption parameters on IRC-50 resin with  $\text{NH}_4^+$

| $\text{NH}_3 \cdot \text{H}_2\text{O}$ concentration<br>(mol/L) | Elution time<br>(min) | $\epsilon$ -PL desorption ratio<br>(%) | $\text{NH}_3 \cdot \text{H}_2\text{O}$ amount<br>(mmol) |
|-----------------------------------------------------------------|-----------------------|----------------------------------------|---------------------------------------------------------|
| 0.05                                                            | 480                   | 20.11                                  | 26.9                                                    |
| 0.10                                                            | 480                   | 66.74                                  | 50.4                                                    |
| 0.15                                                            | 420                   | 92.61                                  | 63.2                                                    |
| 0.20                                                            | 265                   | 95.02                                  | 63.8                                                    |
| 0.25                                                            | 240                   | 95.84                                  | 70.6                                                    |
| 0.30                                                            | 227                   | 96.69                                  | 80.1                                                    |

Table S4 Effect of elution rate on the  $\epsilon$ -PL desorption parameters on IRC-50 resin with Na<sup>+</sup>

| Elution rate<br>(BV/h) | $\epsilon$ -PL desorption ratio<br>(%) | Elution time<br>(min) | NaOH amount<br>(mmol) |
|------------------------|----------------------------------------|-----------------------|-----------------------|
| 1.0                    | 95.66                                  | 570                   | 73.8                  |
| 1.5                    | 97.18                                  | 376                   | 73.0                  |
| 2.0                    | 95.08                                  | 305                   | 77.1                  |
| 2.5                    | 96.16                                  | 270                   | 87.4                  |
| 3.0                    | 96.58                                  | 241                   | 93.6                  |



Table S5 Effect of elution rate on the  $\epsilon$ -PL desorption parameters on IRC-50 resin with  $\text{NH}_4^+$

| Elution rate<br>(BV/h) | $\epsilon$ -PL desorption ratio<br>(%) | Elution time<br>(min) | $\text{NH}_3 \cdot \text{H}_2\text{O}$ amount<br>(mmol) |
|------------------------|----------------------------------------|-----------------------|---------------------------------------------------------|
| 1.0                    | 95.64                                  | 605                   | 61.8                                                    |
| 1.5                    | 96.81                                  | 436                   | 63.8                                                    |
| 2.0                    | 96.05                                  | 322                   | 67.2                                                    |
| 2.5                    | 95.63                                  | 298                   | 70.8                                                    |
| 3.0                    | 95.53                                  | 276                   | 74.4                                                    |

Table S6 Dynamic adsorption and desorption parameters of  $\epsilon$ -PL on IRC-50 resin with  $H^+$ ,  $Na^+$  and  $NH_4^+$

| Exchange ion form | Adsorption capacity (mg/g) | Purity (%) | Protein removal ratio (%) | Pigment removal ratio (%) | $\epsilon$ -PL recovery ratio (%) |
|-------------------|----------------------------|------------|---------------------------|---------------------------|-----------------------------------|
| $H^+$             | 171.03                     | 52.62      | 12.13                     | 37.82                     | 96.4                              |
| $Na^+$            | 303.25                     | 75.86      | 67.36                     | 62.58                     | 96.7                              |
| $NH_4^+$          | 307.96                     | 76.52      | 75.92                     | 64.13                     | 96.2                              |

Table S7 Physical and chemical parameters of the extracted and commercial  $\epsilon$ -PL hydrochloride samples<sup>a</sup>

| Items                         | GB2760-2014  | Extracted $\epsilon$ -PL hydrochloride sample | Commercial $\epsilon$ -PL hydrochloride sample |
|-------------------------------|--------------|-----------------------------------------------|------------------------------------------------|
| Purity (% w/w)                | $\geq 95.00$ | 97.20                                         | 99.00                                          |
| Loss weight (% w/w)           | $\leq 8.00$  | 4.81                                          | 6.55                                           |
| pH (10 g/L in water)          | 2.50-5.50    | 4.61                                          | 5.15                                           |
| Lead content (mg/kg)          | $\leq 2.00$  | ND                                            | ND                                             |
| Burning residue (% w/w)       | $\leq 2.00$  | 0.33                                          | 0.67                                           |
| Total arsenic content (mg/kg) | $\leq 3.00$  | ND <sup>b</sup>                               | ND                                             |

<sup>a</sup> Physical and chemical parameters are detected as GB2760-2014 proved by National Health and Family Planning Commission of the People's Republic of China.

<sup>b</sup> Not detectable.

Table S8 The  $\epsilon$ -PL separation and purification parameters in ten times operation

| Batch No. | Adsorption capacity<br>(mg/g) | Recovery ratio<br>(%) | Purity (%) | Protein removal<br>ratio (%) | Pigment removal ratio<br>(%) |
|-----------|-------------------------------|-----------------------|------------|------------------------------|------------------------------|
| 1         | 307.13                        | 65.27                 | 95.86      | 94.98                        | 99.11                        |
| 2         | 304.54                        | 64.81                 | 96.30      | 95.31                        | 99.36                        |
| 3         | 303.55                        | 63.21                 | 99.11      | 99.54                        | 99.84                        |
| 4         | 304.11                        | 64.22                 | 96.25      | 95.38                        | 99.23                        |
| 5         | 301.08                        | 66.13                 | 97.55      | 96.81                        | 99.27                        |
| 6         | 298.13                        | 72.17                 | 98.15      | 96.57                        | 99.88                        |
| 7         | 295.84                        | 68.85                 | 97.52      | 97.02                        | 99.62                        |
| 8         | 289.98                        | 64.53                 | 96.38      | 95.88                        | 99.17                        |
| 9         | 287.58                        | 65.89                 | 96.82      | 93.85                        | 99.02                        |
| 10        | 283.79                        | 65.02                 | 97.05      | 96.82                        | 99.93                        |
